# Supplementary material for: Crystallization and phase transition of butene/propylene copolymers
Source: Royal Society of Chemistry journal article supplement (doi:10.1039/d3ce00008g), 2023-01-01
Supplement: d3ce00008g1.pdf [file d3ce00008g1.pdf]

## Electronic Supplementary Information

### The crystallization and phase transition of butene/propylene copolymers

Yaru Yuan,<sup>a</sup> Wei Li,<sup>a</sup> Chunjing Qv,<sup>a</sup> and Zhe Ma,<sup>a,\*</sup>

<sup>a</sup>Tianjin Key Laboratory of Composite and Functional Materials, and School of Materials Science and Engineering, Tianjin University, Tianjin 300072, P. R. China

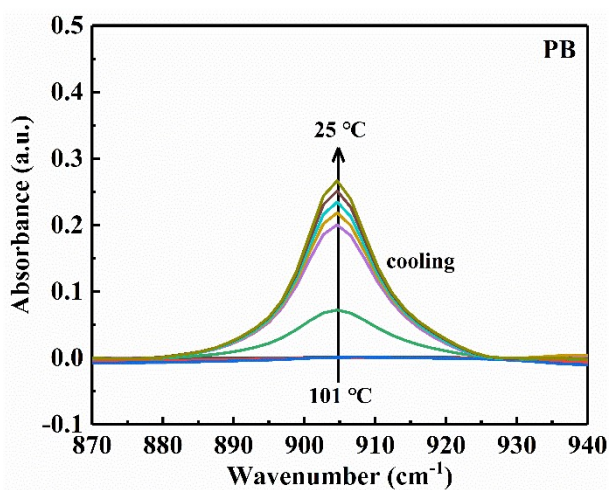

Figure S1. In-situ FTIR spectra of PB during cooling process with 10 °C/min.

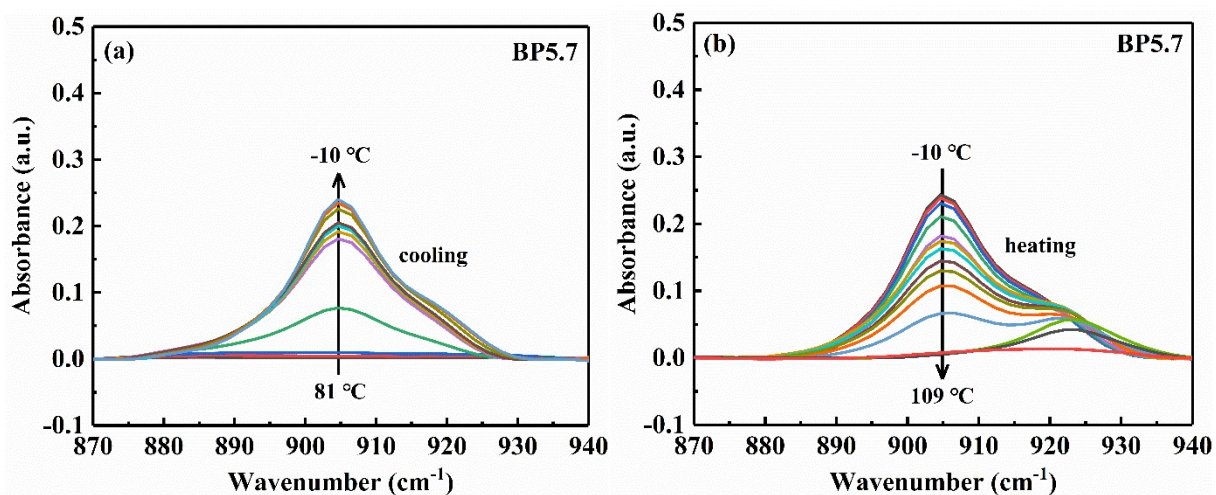

Figure S2. In-situ FTIR spectra of BP5.7 during (a) cooling (b) heating process with 10 °C/min.

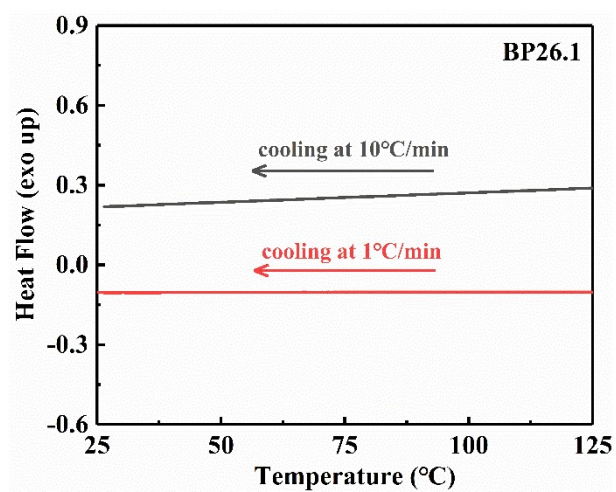

Figure S3. DSC cooling curves at 10 °C/min and 1 °C/min of BP26.1.
